# Supplementary material for: Drowning incidents treated by the Danish Search And Rescue helicopters: A 10-year nationwide registry-based cohort study
Source: Research Square preprint supplement (doi:10.21203/rs.3.rs-7142825/v1), 2025-07-28
Supplement: Supplementary file 1 [file 381ada4c7b87affdb7dc804f.docx]

**Supplementary Files**

**Supplementary Table S1** Explanatory variables for the total population

| **Variable name** | **Definition of Variable** | **Data coding** |
| --- | --- | --- |
| Sex | Patient’s sex | Dichotomous. Male vs female |
| Age | Patient’s age group | Categorical. <20 years; 20-30 years; 30-40 years; 40-50 years; 50-60 years; 60-70 years; >70 years |
| Submersion_status | Submersion status estimated based on the SAR records | Dichotomous. Submersion vs immersion |
| Season | Season of the year at the time of the incident | Dichotomous. Winter vs other |
| SAR_response_time | SAR response time from scramble to arrival on scene. Estimated based on the SAR records | Dichotomous. <25 min vs ≥25 min |
| Bystander_present | Presence of a bystander before SAR arrival | Dichotomous. Yes vs no |
| Ambulance_present | Presence of EMS before SAR arrival | Dichotomous. Yes vs no |
| First_GCS | First GCS score assessed by the SAR physician | Dichotomous. <14 vs ≥14 |
| OHCA | OHCA at any time prehospital | Dichotomous. Yes vs no |
| Rhythm | First monitored cardiac rhythm reported by the SAR personnel | Dichotomous. Shockable vs non-shockable |

Legend: Data extraction template regarding explanatory variables collected from the SAR database. Abbreviations: EMS = Emergency Medical Services; GCS = Glasgow Coma Scale score; OHCA = Out-of-hospital cardiac arrest; SAR = Search And Rescue.

**Supplementary Table S2** Baseline variables

| **Variable name** | **Definition of Variable** | **Data coding** |
| --- | --- | --- |
| Prehospital survival | Alive or dead at case termination. Patients admitted to the hospital with ongoing CPR were considered fatal drowning incidents | Dichotomous. Alive/Dead |
| ID | Case ID | Integer |
| Helicopter base | Name of the SAR helicopter base | Categorical |
| Date | Date | YYYY-MM-DD |
| Month | Month | MM |
| Year | Year | YYYY |
| Scramble | Time of alarm call | HH:MM |
| Airborne | Time of airborne | HH:MM |
| Arrival_on_scene | Time of arrival on scene | HH:MM |
| Departure_from_scene | Time of departure from scene | HH:MM |
| Arrival_hospital | Time of arrival at the hospital | HH:MM |
| Location | Extraction point | GPS coordinates |
| Irreversible_sign_of_death | Irreversible sign of death at SAR arrival | Dichotomous. No/Yes |
| Resp_ventilation | Assisted ventilation performed by the SAR personnel | Dichotomous. No/Yes |
| Resp_oxygen | Supplemental oxygen performed by the SAR personnel | Dichotomous. No/Yes |
| Resp_suction | Suctioning performed by the SAR personnel | Dichotomous. No/Yes |
| Resp_np_airway | Nasopharyngeal airway device performed by the SAR personnel | Dichotomous. No/Yes |
| Resp_op_airway | Oropharyngeal airway device performed by the SAR personnel | Dichotomous. No/Yes |
| Resp_lma | Laryngeal mask airway device performed by the SAR personnel | Dichotomous. No/Yes |
| Resp_ETT | Tracheal intubation performed by the SAR personnel | Dichotomous. No/Yes |
| Resp_trakeotomi | Emergency cricothyroidotomy performed by the SAR personnel | Dichotomous. No/Yes |
| Circ_ecg | ECG performed by the SAR personnel | Dichotomous. No/Yes |
| Circ_iv | Intravenous access performed by the SAR personnel | Dichotomous. No/Yes |
| Circ_io | Intraosseous access performed by the SAR personnel | Dichotomous. No/Yes |
| Circ_fluid | Fluid administered by the SAR personnel | Dichotomous. No/Yes |
| Circ_CPR | CPR performed by the SAR personnel | Dichotomous. No/Yes |
| Circ_lucas | Mechanical chest compression device (LUCAS) performed by the SAR personnel | Dichotomous. No/Yes |
| Circ_adrenalin | Adrenalin performed by the SAR personnel | Dichotomous. No/Yes |
| Expo_rewarm | Rewarming performed by the SAR personnel | Dichotomous. No/Yes |
| Sex | Patient's sex | Dichotomous. Male/Female |
| Age | Patient's age | Numerical |
| Mission_type | Type of mission | Categorical |
| Present_bystander | Bystander present | Dichotomous. No/Yes |
| Present_doctor | Physician present | Dichotomous. No/Yes |
| Present_ambulance | Ambulance present | Dichotomous. No/Yes |
| Resp_status | Respiratory status at arrival | Categorical |
| Circ_status | Circulatory status at arrival | Categorical |
| Rhythm | First monitored cardiac rhythm | Categorical |
| GCS_first | First recorded GCS score | Numerical |
| Transport_sling | Sling used by the SAR personnel to transport the patient | Dichotomous. No/Yes |
| Transport_vacuummattress | Vacuum Mattress used by the SAR personnel to transport the patient | Dichotomous. No/Yes |
| Transport_hoistcarrier | Hoistcarrier used by the SAR personnel to transport the patient | Dichotomous. No/Yes |
| Transport_hypothermiacarrier | Hypothermia carrier used by the SAR personnel to transport the patient | Dichotomous. No/Yes |
| Transport_Scoopcarrier | Scoop carrier used by the SAR personnel to transport the patient | Dichotomous. No/Yes |
| Transport_Spineboard | Spineboard used by the SAR personnel to transport the patient | Dichotomous. No/Yes |

Legend: Data extraction template regarding baseline variables collected from the SAR database. Abbreviations: CPR = Cardiopulmonary Resuscitation; ECG = Electrocardiogram; GCS = Glasgow Coma Scale score; SAR = Search And Rescue.

**Supplementary Table S3** Baseline information on the excluded patients with irreversible signs of death compared to the analysed study population

| **Variable** | **Category** | **Excluded patients with irreversible signs of death**  **(n=18)** | **Analysed study population**  **(n=229)** |
| --- | --- | --- | --- |
| Helicopter base, n (%) | Roskilde | 6 (33) | 96 (42) |
|  | Skrydstrup | 6 (33) | 75 (33) |
|  | Aalborg | 6 (33) | 58 (25) |
| Sex, n (%) | Female | 2 (33) | 19 (11) |
|  | Male | 4 (67) | 150 (89) |
|  | *Missing* | *12* | *60* |
| Age, mean (SD) | Years | 58 (25) | 43 (19) |
|  | *Missing* | *15* | *110* |
| Submersion status, n (%) | Submersion | 18 (100) | 107 (47) |
| Winter, n (%) | Yes | 2 (11) | 20 (9) |
| Response time, median [IQR] | Minutes | 27 [24-44] | 27 [19-36] |
|  | *Missing* | *7* | *108* |

Legend: Baseline information on the excluded patients with irreversible signs of death assessed by the Royal Danish Air Force’s SAR helicopters from 2014-2023 excluded from statistical analyses

Abbreviations: IQR = Interquartile Range, SAR = Search And Rescue, SD = Standard Deviation.
